# Supplementary material
Source: PubMed Central journal article supplement (PMC4860205)
Supplement: NIHMS752809-supplement-Supplementary_tables.pdf [file NIHMS752809-supplement-Supplementary_tables.pdf]

**Supplementary Table A. Differences in Task Difficulty Items (OCBS) and Life Change Items (BCOS) based on Gender.**

| <b>Task Difficulty Item (OCBS)<sup>a</sup></b> | <b>Male<br/><i>f</i> (%)</b> | <b>Female<br/><i>f</i> (%)</b> | <b>Total<br/><i>f</i> (%)</b> | <b>Chi<br/>Square<br/><math>\chi^2</math></b> | <b>Odds<br/>Ratio<br/>(95% CI)</b> | <b><i>p</i></b>              |
|------------------------------------------------|------------------------------|--------------------------------|-------------------------------|-----------------------------------------------|------------------------------------|------------------------------|
| 12. Finding care while away                    | 6(11.8)                      | 70(37.2)                       | 76(31.8)                      | 12.0                                          | 4.5<br>(1.8-13.4)                  | <b>&lt;0.001<sup>c</sup></b> |
| 10. Planning activities                        | 8(15.4)                      | 62(32.5)                       | 70(28.8)                      | 5.8                                           | 2.6<br>(1.1-6.9)                   | 0.024                        |
| 2. Personal care                               | 7(13.7)                      | 55(28.8)                       | 62(25.6)                      | 4.8                                           | 2.5<br>(1.1-7.1)                   | 0.031                        |
| 9. Shopping or running errands                 | 10(19.2)                     | 71(37.2)                       | 81(33.3)                      | 5.9                                           | 2.5<br>(1.1-5.9)                   | 0.019                        |
| 4. Providing emotional support                 | 13(25.0)                     | 86(45.0)                       | 99(40.7)                      | □6.8                                          | 2.5<br>(1.2-5.3)                   | 0.011                        |
| 1. Giving medication or nursing treatments     | 8(15.4)                      | 52(27.2)                       | 60(24.7)                      | 3.1                                           | 2.1<br>(0.9-5.4)                   | 0.102                        |
| 7. Managing finances                           | 17(32.7)                     | 94(49.2)                       | 111(45.7)                     | 4.5                                           | 2.0<br>(1.0-4.1)                   | 0.041                        |
| 13. Communicate with survivor                  | 11(21.2)                     | 61(31.9)                       | 72(29.6)                      | 2.3                                           | 1.8<br>(0.8-4.0)                   | 0.170                        |
| 11. Managing behaviours                        | 16(30.8)                     | 83(43.5)                       | 99(40.7)                      | 2.7                                           | 1.7<br>(0.9-3.6)                   | 0.112                        |
| 6. Providing transportation                    | 17(33.3)                     | 87(45.6)                       | 104(43.0)                     | 2.5                                           | 1.7<br>(0.8-3.4)                   | 0.152                        |
| 8. Household tasks                             | 20(38.5)                     | 95(49.7)                       | 115(47.3)                     | 2.1                                           | 1.6<br>(0.8-3.1)                   | 0.161                        |
| 14. Managing services, resources               | 14(26.9)                     | 69(36.3)                       | 83(34.3)                      | 1.6                                           | 1.6<br>(0.8-3.3)                   | 0.249                        |
| 15. Talking with health professionals          | 12(23.1)                     | 54(28.4)                       | 66(27.3)                      | 0.6                                           | 1.3<br>(0.6-3.0)                   | 0.487                        |

| 5. Monitoring progress                     | 14(26.9)                     | 61(32.3)                       | 75(31.1)                      | 0.5                                       | 1.3<br>(0.6-2.8)              | 0.503           |
|--------------------------------------------|------------------------------|--------------------------------|-------------------------------|-------------------------------------------|-------------------------------|-----------------|
| 3. Assisting with mobility                 | 11(21.2)                     | 46(24.2)                       | 57(23.6)                      | 0.2                                       | 1.2<br>(0.5-2.8)              | 0.715           |
| <b>Life Change Item (BCOS)<sup>b</sup></b> | <b>Male<br/><i>f</i> (%)</b> | <b>Female<br/><i>f</i> (%)</b> | <b>Total<br/><i>f</i> (%)</b> | <b>Chi-Square<br/><math>\chi^2</math></b> | <b>Odds Ratio<br/>(95%CI)</b> | <b><i>p</i></b> |
| 14. Physical functioning                   | 6(11.5)                      | 45(23.6)                       | 51(21)                        | 3.6                                       | 2.4<br>(0.9-7.2)              | 0.082           |
| 2. Physical health                         | 7(13.5)                      | 51(26.7)                       | 58(23.9)                      | 3.9                                       | 2.3<br>(1.0-6.5)              | 0.065           |
| 7. Level of energy                         | 16(30.8)                     | 97(50.8)                       | 113(46.5)                     | 6.6                                       | 2.3<br>(1.2-4.8)              | 0.012           |
| 13. Relationship with survivor             | 5(9.6)                       | 36(18.9)                       | 41(16.9)                      | 2.5                                       | 2.2<br>(0.8-7.5)              | 0.145           |
| 8. Emotional                               | 15(28.9)                     | 84(44.0)                       | 99(40.7)                      | 3.9                                       | 1.9<br>(1.0-4.1)              | 0.057           |
| 4. Ability to cope with stress             | 11(21.2)                     | 65(34.0)                       | 76(31.3)                      | 3.2                                       | 1.9<br>(0.9-4.4)              | 0.09            |
| 5. Relationship with friends               | 9(17.3)                      | 53(27.9)                       | 62(25.6)                      | 2.4                                       | 1.9<br>(0.8-4.6)              | 0.152           |
| 11. Relationship with family               | 7(13.5)                      | 41(21.5)                       | 48(19.8)                      | 1.7                                       | 1.8<br>(0.7-5.0)              | 0.241           |
| 9. Roles in life                           | 11(21.2)                     | 60(31.4)                       | 71(29.2)                      | 2.1                                       | 1.7<br>(0.8-3.9)              | 0.171           |
| 10. Time for social activities             | 28(53.9)                     | 125(65.8)                      | 153(63.2)                     | 2.5                                       | 1.7<br>(0.8-3.2)              | 0.144           |
| 3. Time for family activities              | 26(50.0)                     | 116(60.7)                      | 142(58.4)                     | 1.9                                       | 1.6<br>(0.8-3.2)              | 0.204           |
| 15. <u>Physical</u> General health         | 9(17.3)                      | 43(22.5)                       | 52(21.4)                      | 0.7                                       | 1.4<br>(0.6-3.5)              | 0.454           |

|                   |          |           |           |     |                  |       |
|-------------------|----------|-----------|-----------|-----|------------------|-------|
| 12. Financial     | 23(44.2) | 100(52.4) | 123(50.6) | 1.1 | 1.4<br>(0.7-2.7) | 0.349 |
| 1. Self esteem    | 6(11.5)  | 29(15.2)  | 35(14.4)  | 0.4 | 1.4<br>(0.7-2.7) | 0.657 |
| 6. Future outlook | 19(36.5) | 61(31.9)  | 80(32.9)  | 0.4 | 0.8<br>(0.4-1.7) | 0.618 |

---

*Note.* <sup>a</sup>OCBS item dichotomized with f(%) indicating those who rated task item as moderately to extremely difficult. <sup>b</sup>BCOS item dichotomized with f(%) indicating those who rated life change item as changing for the worst. <sup>c</sup>Meets Benjamini-Hochberg false discovery rate criterion.

**Supplementary Table B. Differences in Life Change Items (BCOS) based on Race.**

|                                | <b>African-American<br/><i>f</i>(%)</b> | <b>Non African-American<br/><i>f</i>(%)</b> | <b>Total sample<br/><i>f</i>(%)</b> | <b>Chi Square<br/><math>\chi^2</math></b> | <b>Odds Ratio<br/>(95% CI)</b> | <b><i>p</i></b>             |
|--------------------------------|-----------------------------------------|---------------------------------------------|-------------------------------------|-------------------------------------------|--------------------------------|-----------------------------|
| 3. Time for family activities  | 22(37.3)                                | 119(65.4)                                   | 141(58.5)                           | 14.5                                      | 3.1<br>(1.7-6.3)               | <b>&lt;.001<sup>c</sup></b> |
| 8. Emotional well-being        | 14(23.7)                                | 85(46.7)                                    | 99(41.1)                            | 9.7                                       | 2.8<br>(1.4-5.9)               | <b>.002<sup>c</sup></b>     |
| 1. Self-esteem                 | 4(6.8)                                  | 31(17.0)                                    | 35(14.5)                            | 3.8                                       | 2.9<br>(0.9-11.1)              | .057                        |
| 6. Future outlook              | 13(22.0)                                | 67(36.8)                                    | 80(33.2)                            | 4.4                                       | 2.0<br>(1.0-4.6)               | .040                        |
| 7. Level of energy             | 22(37.3)                                | 91(50.0)                                    | 113(46.9)                           | 2.9                                       | 1.7<br>(0.9-3.2)               | .100                        |
| 4. Ability to cope with stress | 15(25.4)                                | 61(33.5)                                    | 76(31.5)                            | 1.4                                       | 1.5<br>(0.7-3.1)               | .264                        |
| 13. Relationship with survivor | 8(13.6)                                 | 32(17.6)                                    | 40(16.6)                            | .5                                        | 1.4<br>(0.6-3.6)               | .550                        |
| 2. Physical health             | 12(25.3)                                | 46(25.3)                                    | 58(24.1)                            | .6                                        | 1.3<br>(0.6-25.0)              | .488                        |
| 9. Roles in life               | 15(25.4)                                | 56(30.8)                                    | 71(29.5)                            | .6                                        | 1.3<br>(0.6-2.7)               | .512                        |
| 10. Time for social activities | 35(59.3)                                | 118(65.2)                                   | 153(63.7)                           | .7                                        | 1.3<br>(0.7-2.4)               | .438                        |
| 14. Physical functioning       | 11(18.6)                                | 40(22)                                      | 51(21.2)                            | .3                                        | 1.2<br>(0.6-2.9)               | .714                        |
| 12. Financial well-being       | 32(54.2)                                | 90(49.4)                                    | 122(50.6)                           | .4                                        | .8<br>(0.4-1.5)                | .552                        |
| 15. General health             | 15(25.4)                                | 37(20.3)                                    | 52(21.6)                            | .7                                        | .8<br>(0.4-1.6)                | .467                        |
| 5. Relationship with friends   | 18(30.5)                                | 44(24.3)                                    | 62(25.8)                            | .9                                        | .7<br>(0.4-1.5)                | .392                        |

|                                 |          |          |          |    |                 |      |
|---------------------------------|----------|----------|----------|----|-----------------|------|
| 11. Relationship<br>with family | 14(23.7) | 34(18.7) | 48(19.9) | .7 | .7<br>(0.4-1.6) | .453 |
|---------------------------------|----------|----------|----------|----|-----------------|------|

---

*Note.* <sup>a</sup>OCBS item dichotomized with f(%) indicating those who rated task item as moderately to extremely difficult. <sup>b</sup>BCOS item dichotomized with f(%) indicating those who rated life change item as changing for the worst. <sup>c</sup>Meets Benjamini-Hochberg false discovery rate criterion.
